# Supplementary figures and images for: Enhancing fouling resistance of graphite sheets for electrochemical sensing of bisphenol-A
Source: Royal Society of Chemistry journal article supplement (doi:10.1039/d5an00313j), 2025-01-01

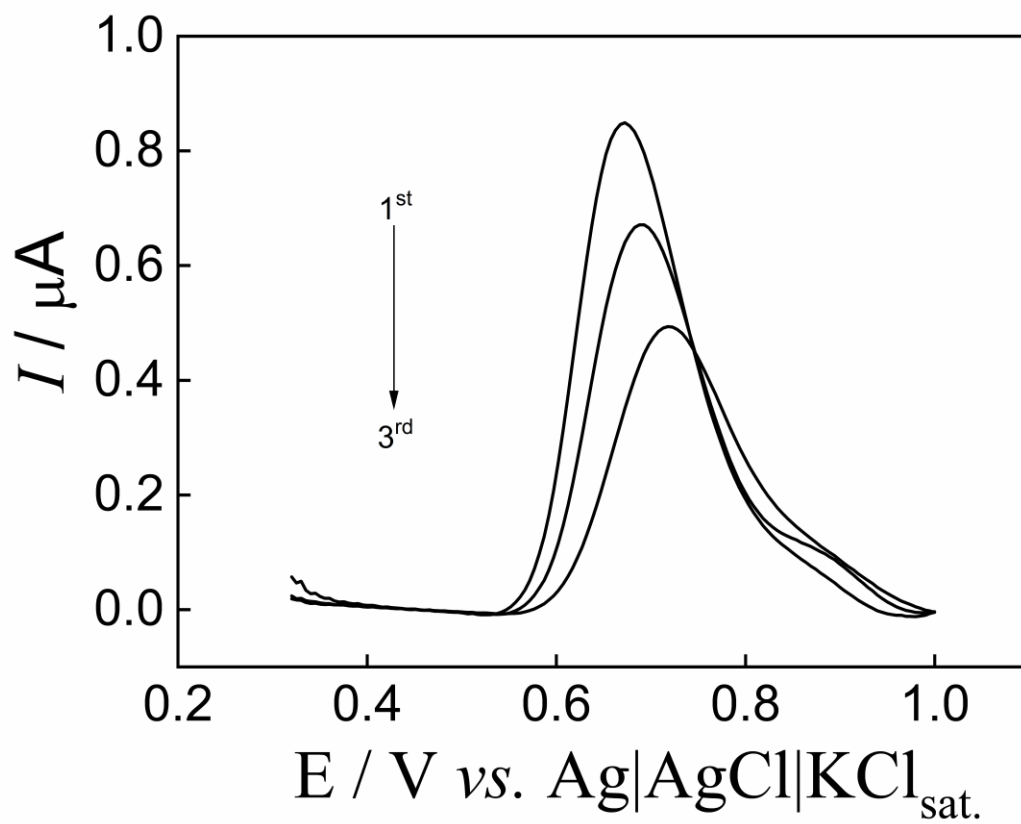

Supplement: d5an00313j5.pdf [file d5an00313j5.pdf]

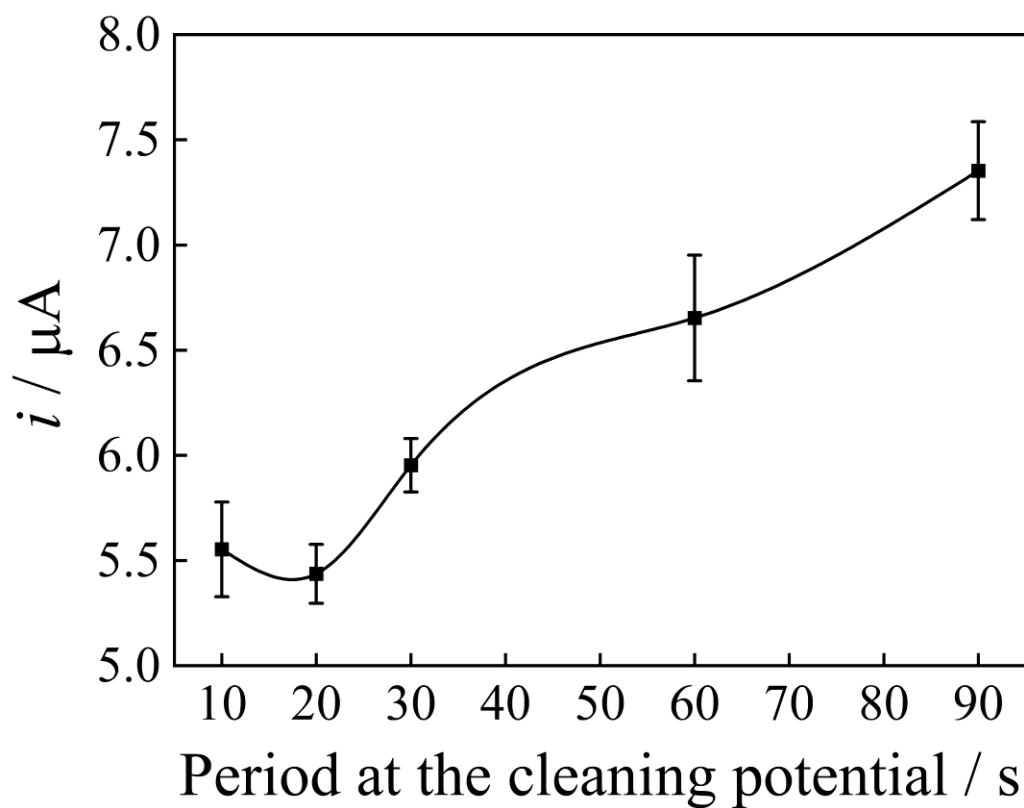

Supplement: d5an00313j6.pdf [file d5an00313j6.pdf]
